# Supplementary material
Source: MDPI journal article supplement (https://www.mdpi.com/2079-9276/10/2/17)
Supplement: s1 [file s1]

# Technoeconomic Assessment of Organic Halide Based Gold Recovery from Waste Electronic and Electrical Equipment

Jamie Wordsworth <sup>1</sup>, Nadia Khan <sup>1</sup>, Jack Blackburn <sup>1</sup>, Jason E. Camp <sup>1,2</sup> and Athanasios Angelis-Dimakis <sup>1,\*</sup>

<sup>1</sup> Department of Chemical Sciences, School of Applied Sciences, University of Huddersfield, Huddersfield HD1 3DH, UK; wordsworth.jamie@gmail.com (J.W.); n.khan17@hotmail.co.uk (N.K.); jackblackburn01@gmail.com (J.B.); jc3064@bath.ac.uk (J.E.C.)

<sup>2</sup> Department of Chemistry, University of Bath, Bath BA2 7AY, UK

\* Correspondence: a.angelisdimakis@hud.ac.uk

## Supplementary Material

### 1. SEM Imaging

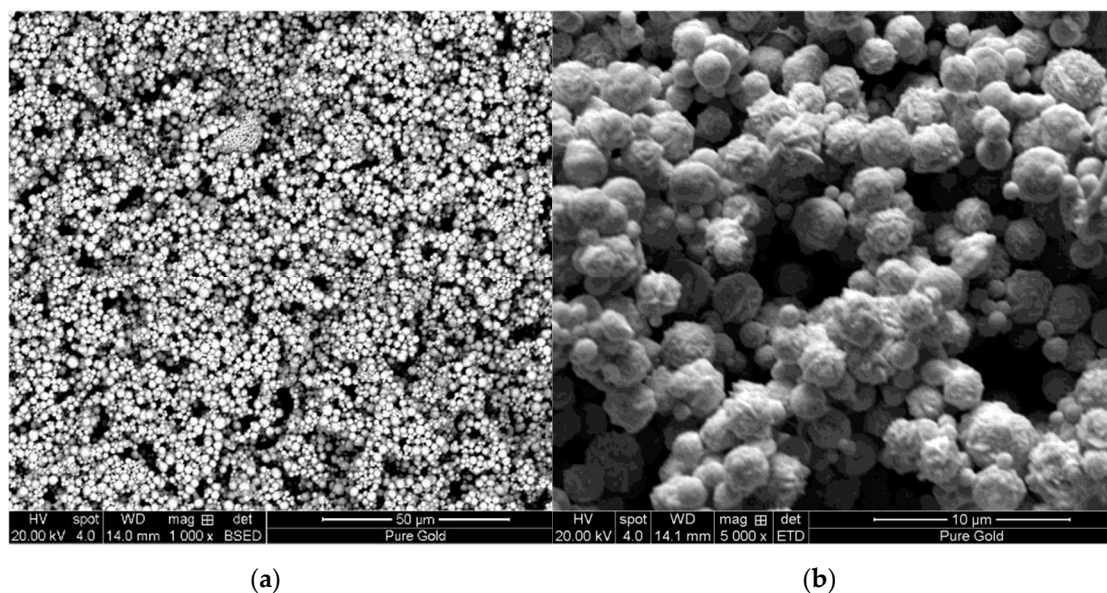

**Figure S1.** SEM Images of the pure gold powder at 1000× (left) and 5000× (right).

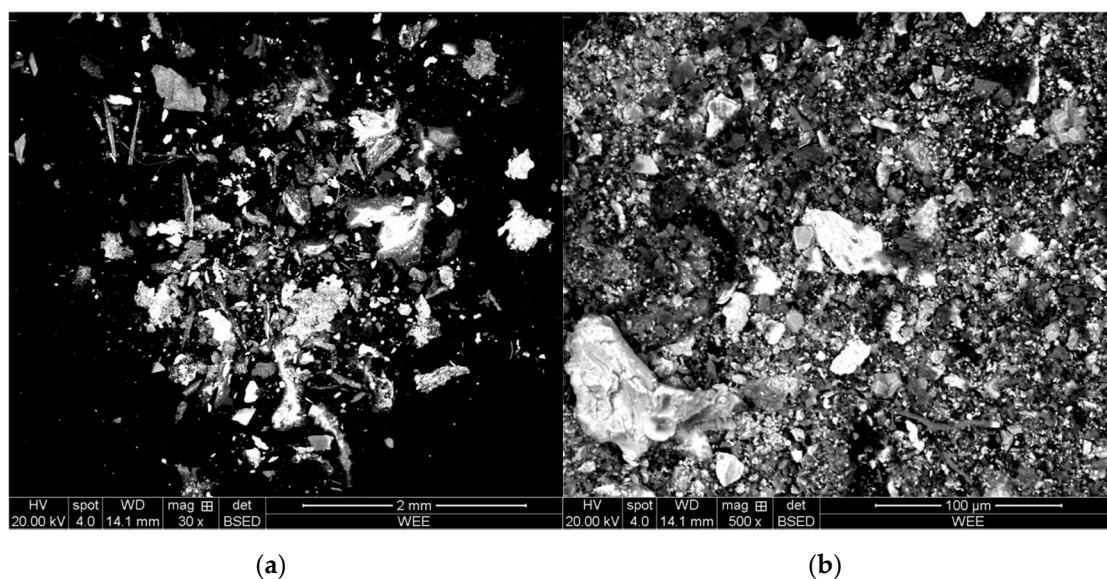

**Figure S2.** SEM Images of the WEEE dust at 30× (left) and 500× (right).

## 2. WEEE Dust Composition

**Table S1.** WEEE Dust Composition via semi quantitative ICPMS

| Element   | %w/w   | Element      | %w/w   | Element  | %w/w   |
|-----------|--------|--------------|--------|----------|--------|
| Lithium   | < 0.01 | Molybdenum   | < 0.01 | Hafnium  | < 0.01 |
| Beryllium | < 0.01 | Ruthenium    | < 0.01 | Tantalum | < 0.01 |
| Boron     | 0.014  | Rhodium      | < 0.01 | Tungsten | < 0.01 |
| Sodium    | 0.008  | Palladium    | < 0.01 | Rhenium  | < 0.01 |
| Magnesium | 0.119  | Silver       | 0.094  | Osmium   | < 0.01 |
| Aluminium | 2.912  | Cadmium      | < 0.01 | Iridium  | < 0.01 |
| Potassium | 0.014  | Indium       | < 0.01 | Platinum | < 0.01 |
| Calcium   | 1.552  | Tin          | 0.766  | Gold     | 0.011  |
| Scandium  | < 0.01 | Antimony     | 0.078  | Mercury  | 0.029  |
| Titanium  | 0.398  | Tellurium    | < 0.01 | Thallium | < 0.01 |
| Vanadium  | < 0.01 | Iodine       | < 0.01 | Lead     | 0.112  |
| Chromium  | 0.049  | Caesium      | < 0.01 | Bismuth  | 0.048  |
| Manganese | 1.844  | Barium       | 1.987  | Thorium  | < 0.01 |
| Iron      | 22.911 | Lanthanum    | < 0.01 | Uranium  | < 0.01 |
| Cobalt    | 0.020  | Cerium       | < 0.01 | -        | -      |
| Nickel    | 0.338  | Praseodymium | 0.025  | -        | -      |
| Copper    | 1.303  | Neodymium    | 0.097  | -        | -      |
| Zinc      | 9.902  | Samarium     | < 0.01 | -        | -      |
| Gallium   | 0.516  | Europium     | < 0.01 | -        | -      |
| Germanium | < 0.01 | Gadolinium   | 0.012  | -        | -      |
| Arsenic   | < 0.01 | Terbium      | < 0.01 | -        | -      |
| Selenium  | < 0.01 | Dysprosium   | 0.0131 | -        | -      |
| Rubidium  | < 0.01 | Holmium      | < 0.01 | -        | -      |
| Strontium | 0.200  | Erbium       | < 0.01 | -        | -      |
| Yttrium   | 0.019  | Thulium      | < 0.01 | -        | -      |
| Zirconium | 0.063  | Ytterbium    | < 0.01 | -        | -      |
| Niobium   | < 0.01 | Lutetium     | < 0.01 | -        | -      |
